# Supplementary material for: Isolation of an ES-Derived Cardiovascular Multipotent Cell Population Based on VE-Cadherin Promoter Activity
Source: Stem Cells Int. 2016 Dec 22;2016:8305624. doi: 10.1155/2016/8305624 (PMC5215608; doi:10.1155/2016/8305624)
Supplement: Supplementary file 1 — Pvec- and Pvec-EGFP-genetically modified ESC clones were characterized in respect to pluripotency and differentiation properties (Supplementary Figure S1). ES clone A11 morphology, survival and differentiation was examined during hugromycin selection (Supplementary Figure S2). Endothelial maturation stage of Pvec+ cells grown in the presence of SB-216763 was assessed by vWF and CD39 expression (Supplementary Figure S3). Pvec+ cells did not differentiate in the presence of SB-216763 (Supplementary Figure S4). Emergence of SMA+ and vimentin+ mesenchymal-origin cells after 12 days of CEDPs differentiation (Supplementary Figure S5). Control experiments demonstrating absence of neuroectodermal and endodermal markers expression at d10 of CEDPs differentiation (Supplementary Figure S6). Morphology of spheres formed by CEDPs embedded in alginate hydrogel for 5 days (Supplementary Figure S7). RT-PCR analysis demonstrating absence of pluripotency markers Oct3/4 and Nanog expression in the heart of transplanted animals (Supplementary Figure S8). Sequence alignment data supporting species-selectivity of the MLC2v primer set used to identify putative mouse-derived ventricular myocytes in the rat heart (Supplementary Figure S9). Supplementary Table S1 shows the sequences of all PCR primers used in the present study. Quantification of Isl1+ cells in cryosections of CEDPs-injected rat hearts by immunocytochemistry (Supplementary Table S2). [file 8305624.f1.pdf]

Supplementary Table 1 is presenting the PCR primer list used.

| <b>Gene name</b> | <b>forward primer 5-&gt;3</b>  | <b>reverse primer 5-&gt;3</b> | <b>product size<br/>cDNA</b> |
|------------------|--------------------------------|-------------------------------|------------------------------|
| VE-Cadherin      | GTAACCCTGTAGGGAAAGAG<br>TCCATT | GCATGCTCCCGATTAACT<br>GCCATA  | 260bp                        |
| PECAM-1          | GTCATGGCCATGGTCGAGTA           | CTCCTCGGCGATCTTGCTG<br>AA     | 260bp                        |
| Flk1             | TTTGGCAAATACAACCCTTCA<br>GA    | GCAGAAGATACTGTCACCA<br>CC     | 133bp                        |
| Nfatc1           | AGGTGCAGCCCAAGTCTCAC           | GTGGCCATCTGGAGCCTTC<br>T      | 620bp                        |
| Nrg1             | CCAATGGCCACATTGCCAATA<br>GGT   | AGCCTGGCCTGTAATTCTTC<br>CTGT  | 229bp                        |
| Isl-1            | GCAGCTCCAGCAGCAGCAAC<br>CCA    | TGGGAGCTGCGAGGACATC<br>GATGC  | 253bp                        |
| Nkx2.5           | AGCCGCCCCCACAATTTTACC<br>CG    | GCGAGAAGAGCACGCGTG<br>GCT     | 178bp                        |
| Gata4            | GCGGAAGGAGGGGATTCAAA           | TGAATGTCTGGGACATGGA<br>GC     | 230bp                        |
| cTnT             | AGCCCACATGCCTGCTTAAA           | TCTCGGCTCTCCCTCTGAA<br>C      | 115bp                        |
| MLC2v            | ACTTCACCGTGTTCTCACGA<br>TGT    | TCCGTGGGTAATGATGTGG<br>ACCAA  | 254bp                        |

|         |                              |                              |       |
|---------|------------------------------|------------------------------|-------|
| MLC2a   | AAGGGAAGGGTCCCATCAAC<br>TTCA | AACAGTTGCTCTACCTCAG<br>CAGGA | 202bp |
| AFP     | CTTCCCTCATCCTCCTGCTAC        | ACAAACTGGGTAAAGGTGA<br>TGG   | 234bp |
| FOXA2   | CCGTGAAGATGGAAGGGCAC         | TCATTCCAGCGCCACATA<br>G      | 210bp |
| Pdx1    | CCTTTCCCGAATGGAACCGA<br>G    | GGTCAAGTTCAACATCACT<br>GCC   | 264bp |
| Nestin  | CATACAGGACTCTGCTGGAG<br>G    | AGGTGCTGGTCCTCTGGTA<br>T     | 130bp |
| Tubb3   | CTTTTCGTCTCTAGCCGCGT         | TCCCAGAACTTGGCCCCTA<br>T     | 94bp  |
| Pax6    | TGAGAAGTGTGGGAACCAGC         | CACTCCGCTGTGACTGTTC<br>T     | 214bp |
| NANOG   | CCAGTGGAGTATCCCAGCAT         | GTTGGTCCAGGTCTGGTTG<br>T     | 159bp |
| SOX2    | AAAGGGTTCTTGCTGGGTTT         | AAACAAGACCACGAAAACG<br>G     | 156bp |
| b-actin | GTGACGTTGACATCCGTAAA<br>G    | GCCGGACTCATCGTACTC           | 244bp |
| gapdh   | AGGTCGGTGTGAACGGATTT<br>G    | GGGGTCGTTGATGGCAACA          | 94bp  |

Supplementary Figure S1.

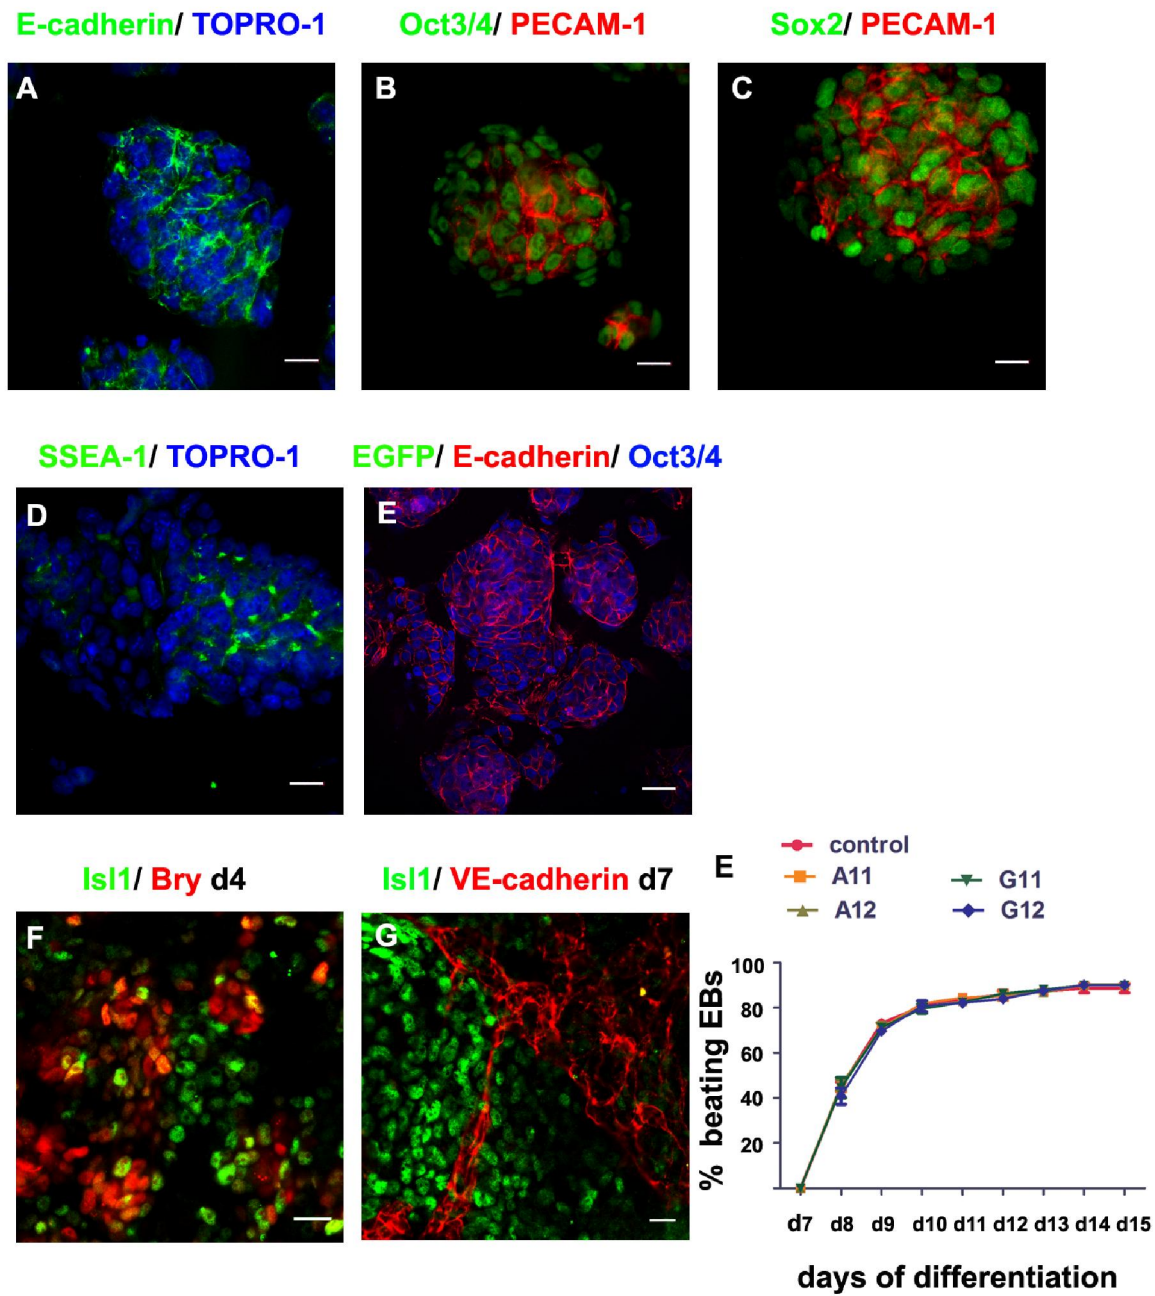

Supplementary Figure S1: Characterization of Pvec- and Pvec-EGFP- genetically modified ESCs. (A-E) Undifferentiated cells from clone A11 and G11 express pluripotency markers Oct3/4, Sox2, PECAM-1, SSEA-1 and E-cadherin but not EGFP, as shown by immunostaining.

DNA was stained with TOPRO-1. (F) Mesodermal  $Bry^+$  cells and  $Isl1^+$  cardiovascular progenitor cells in A11 derived-EBs at d4. (G) Endothelial VE-cadherin $^+$  cells were typically located adjacent to  $Isl1^+$  progenitor cells in A11 derived-EBs at d7. (H) Statistical analysis of beating activity in clones A11, A12, G11, G12 and control (E14T ESCs) during differentiation days 7-15 (an EB was considered as beating if contained one or more beating areas). \*\*\*P <0,001 vs control. Data were evaluated by Repeated-measures two-way ANOVA, followed by Bonferroni post-hoc analysis for multiple comparisons. Probability values P <0.05 were considered significant. Scale bars: 20  $\mu$ m

**Supplementary Figure S2.**

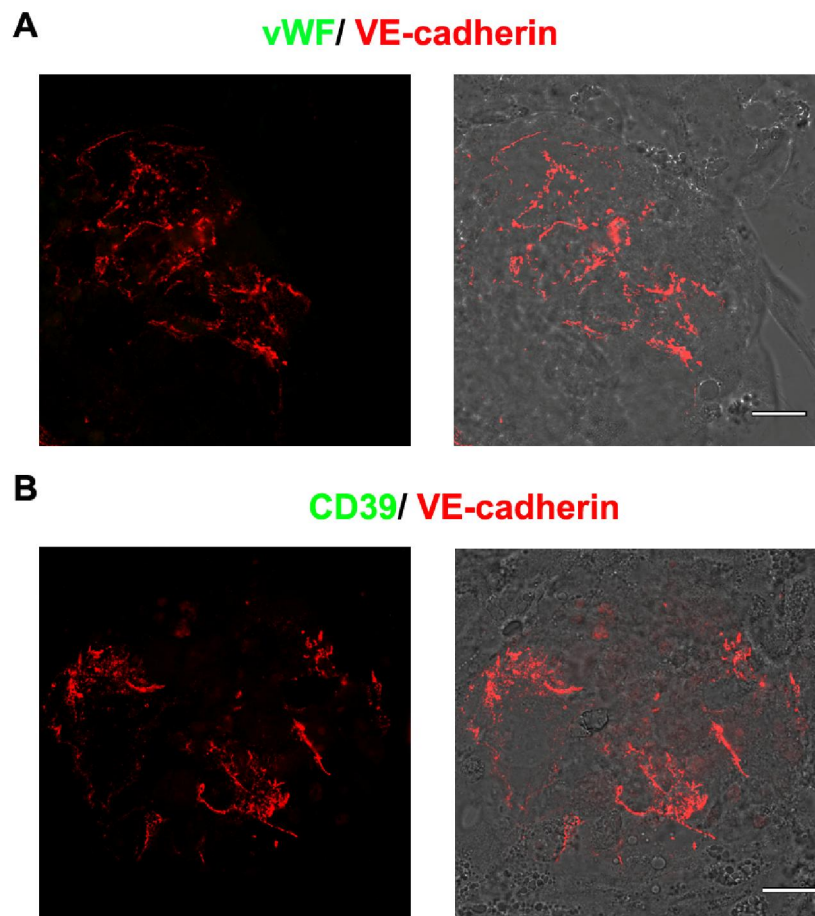

Supplementary Figure S2: Pvec+ cells express VE-cadherin but not vWF or CD39 after double immunostaining with anti-VE-cadherin and anti- vWF (A) or anti- CD39 (B). Right panels are the immunofluorescence images superimposed on the background of phase-contrast optics. Scale bars: (A-B) 20  $\mu$ m

**Supplementary Figure S3.**

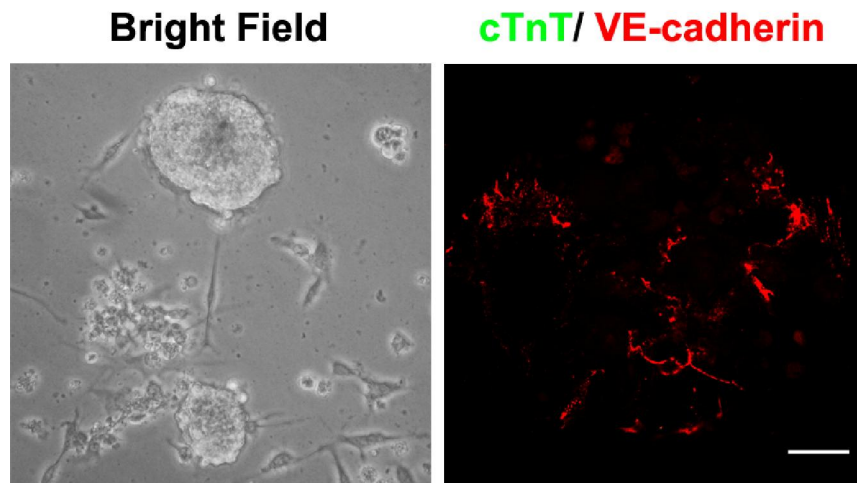

Supplementary Figure S3: (A) Typical image of spheres formed in the presence of SB-216763 after 5 days of CEDPs differentiation. (B) cTnT<sup>+</sup> cells did not form under these conditions after 10 days of CEDPs differentiation, after immunostaining with anti-cTnT and anti-VE-cadherin. Scale bar: (B) 20  $\mu$ m

Supplemental video of a beating area after 15 days of CEDPs differentiation.

Supplementary Figure S4.

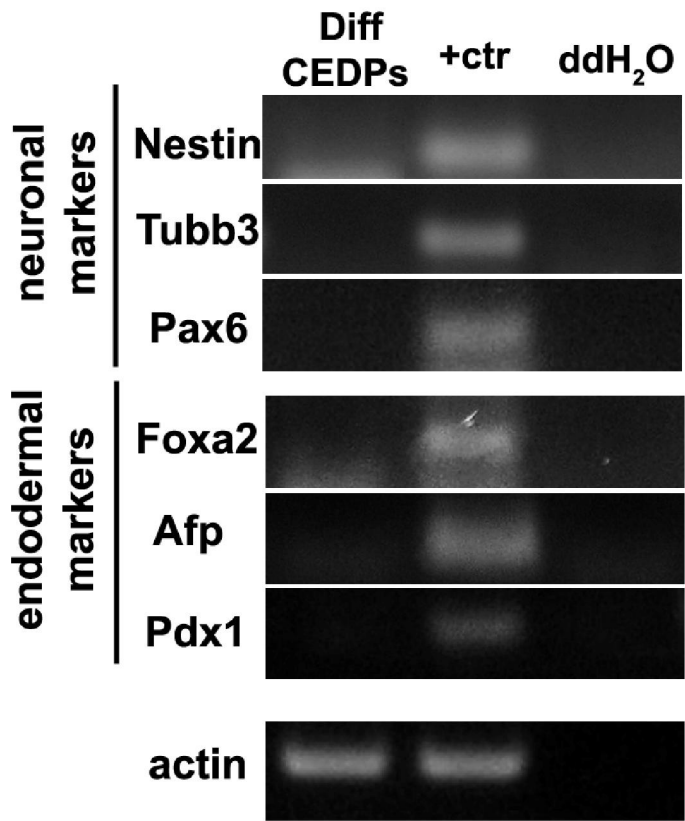

Supplementary Figure S4: RT-PCR analysis of CEDPs differentiation products at d10 showed absence of neuroectodermal and endodermal markers.

Supplementary Figure S5.

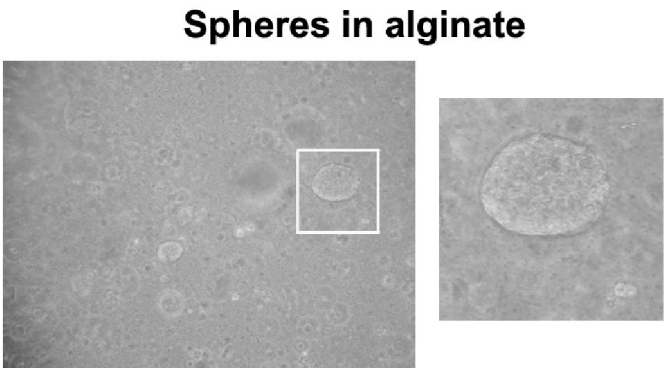

Supplementary Figure S5: Optical microscope image of spheres formed in gelatinised alginate hydrogel at day 5 of CEDPs differentiation (magnification corresponds to marked area).

**Supplementary Figure S6.**

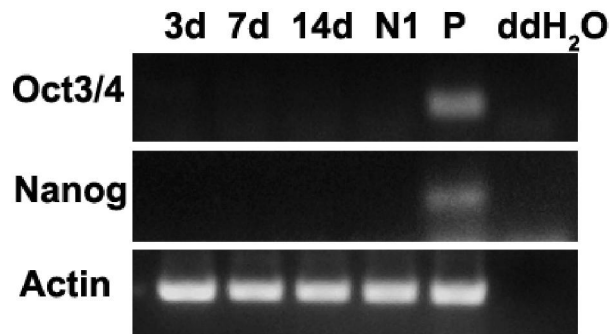

Supplementary Figure S6: Absence of pluripotency markers Oct3/4 and Nanog in transplanted animals by RT-PCR analysis.

## Supplementary Figure S7.

[Download](#)
[GenBank](#)
[Graphics](#)

Mus musculus myosin, light polypeptide 2, regulatory, cardiac, slow (Myl2), mRNA  
Sequence ID: [ref|NM\\_010861.3|](#) Length: 633 Number of Matches: 1

Range 1: 280 to 303 [GenBank](#) [Graphics](#) [Next Match](#) [Previous Match](#)

| Score         | Expect | Identities  | Gaps     | Strand    |
|---------------|--------|-------------|----------|-----------|
| 48.1 bits(24) | 1e-04  | 24/24(100%) | 0/24(0%) | Plus/Plus |

```

Query 1      ACTTCACCGTGTTCCTCACGATGT 24
            |||
Sbjct 280    ACTTCACCGTGTTCCTCACGATGT 303

```

[Download](#)
[GenBank](#)
[Graphics](#)

Mus musculus myosin, light polypeptide 2, regulatory, cardiac, slow (Myl2), mRNA  
Sequence ID: [ref|NM\\_010861.3|](#) Length: 633 Number of Matches: 1

Range 1: 510 to 533 [GenBank](#) [Graphics](#) [Next Match](#) [Previous Match](#)

| Score         | Expect | Identities  | Gaps     | Strand     |
|---------------|--------|-------------|----------|------------|
| 48.1 bits(24) | 1e-04  | 24/24(100%) | 0/24(0%) | Plus/Minus |

```

Query 1      TCCGTGGGTAATGATGTGGACCAA 24
            |||
Sbjct 533    TCCGTGGGTAATGATGTGGACCAA 510

```

[Download](#) [GenBank](#) [Graphics](#)

Rattus norvegicus myosin light chain 2 (Myl2), mRNA  
Sequence ID: [ref|NM\\_001035252.2|](#) Length: 677 Number of Matches: 1  
[See 1 more title\(s\)](#)

Range 1: 262 to 285 [GenBank](#) [Graphics](#) [Next Match](#) [Previous Match](#)

| Score         | Expect | Identities | Gaps     | Strand    |
|---------------|--------|------------|----------|-----------|
| 32.2 bits(16) | 0.84   | 22/24(92%) | 0/24(0%) | Plus/Plus |

[Download](#) [GenBank](#) [Graphics](#)

Rattus norvegicus myosin light chain 2 (Myl2), mRNA  
Sequence ID: [ref|NM\\_001035252.2|](#) Length: 677 Number of Matches: 1  
[See 1 more title\(s\)](#)

Range 1: 492 to 515 [GenBank](#) [Graphics](#) [Next Match](#) [Previous Match](#)

| Score         | Expect | Identities | Gaps     | Strand     |
|---------------|--------|------------|----------|------------|
| 32.2 bits(16) | 0.84   | 22/24(92%) | 0/24(0%) | Plus/Minus |

```

Query 1      TCCGTGGGTAATGATGTGGACCAA 24
            |||
Sbjct 515    TCCGTGGGTGATGATGTGAACCAA 492

```

Supplementary Figure S7: Sequence alignment data supporting species-selectivity of the MLC2v primer set used to identify putative mouse-derived ventricular myocytes in the rat heart.

Supplementary Table S2 is presenting the mean of Isl1<sup>+</sup> cells counted in two non-sequential sections.

| sampled sections # | Isl1 <sup>+</sup> number of cells counted # mean |
|--------------------|--------------------------------------------------|
| 110 (108 and 112)  | 65                                               |
| 140 (138 and 142)  | 472                                              |
| 190 (188 and 192)  | 736                                              |
| 240 (238 and 242)  | 755                                              |
| 280 (278 and 282)  | 435                                              |
| 330 (328 and 332)  | 356                                              |
| 370 (368 and 372)  | 71                                               |
